# Supplementary material
Source: PubMed Central journal article supplement (PMC4595594)
Supplement: ncomms9194-s1.pdf [file ncomms9194-s1.pdf]

## Supplementary Figures

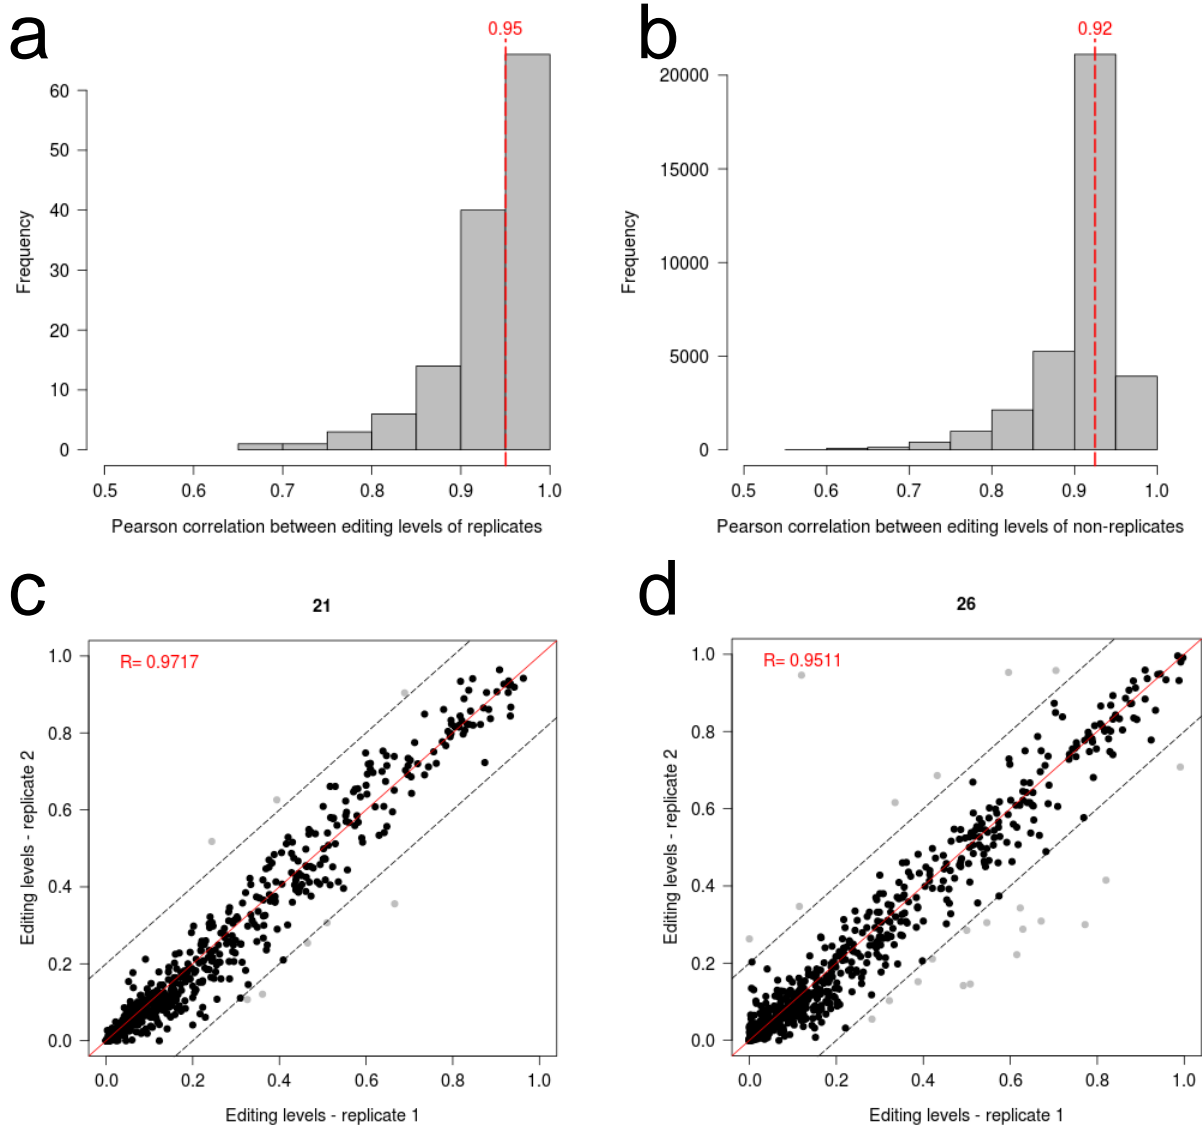

**Supplementary Figure 1 - mmPCR-seq data for biological replicates.** Pairwise spearman correlations between all (a) biological replicate and (b) non-replicate samples. The dashed red lines represent median values. Representative scatterplots of the editing levels measured in replicate 1 and replicate 2 for strains (c) 21 and (d) 26. Points shaded in grey had greater than 20% editing level difference between biological replicates and were excluded from further analysis.

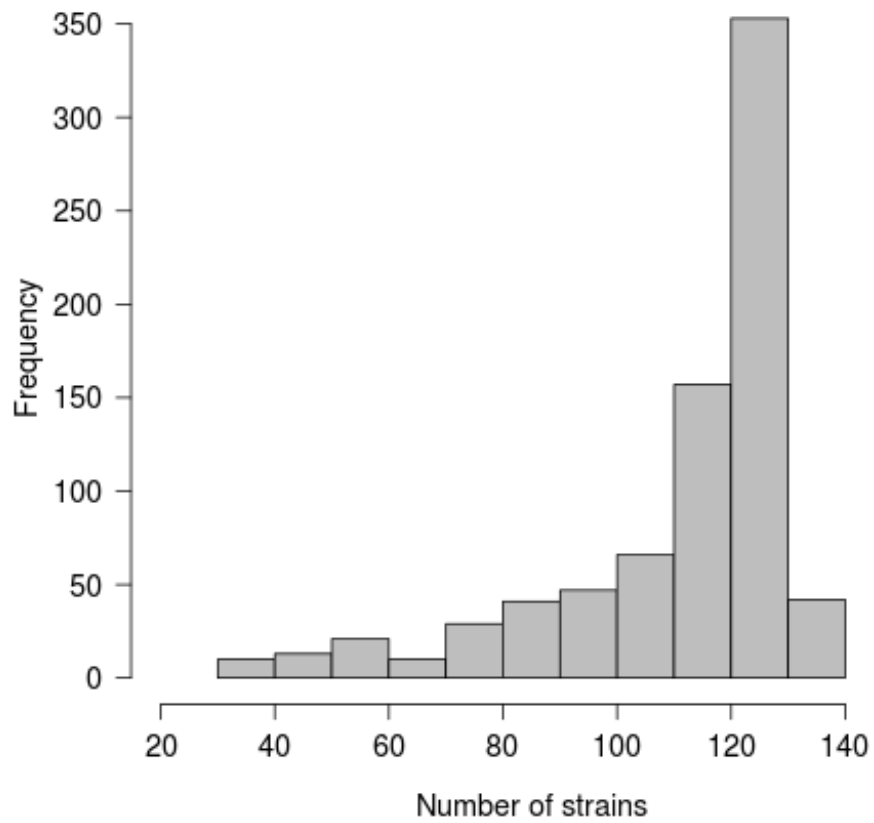

**Supplementary Figure 2 – Number of DGRP strains with measurements at 789 editing sites.** Histogram of number of DGRP strains with editing level measurements for each of the 789 editing sites.

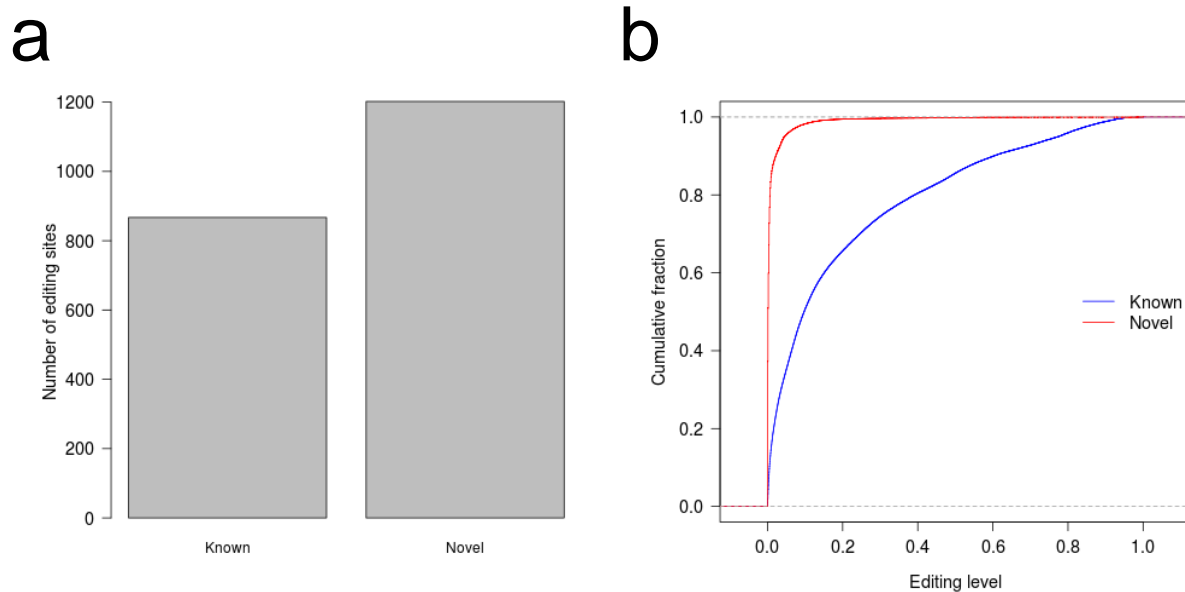

**Supplementary Figure 3 - Identification of novel RNA editing sites.** We used mmPCR-seq to identify novel RNA editing sites in the targeted loci. For each sample, we set a variant frequency cutoff to ensure at least 90% of the called variants were A-to-G or T-to-C mismatches. **(a)** The number of known and novel RNA editing sites in the targeted loci. **(b)** Cumulative distribution of editing levels for the known and novel editing sites.

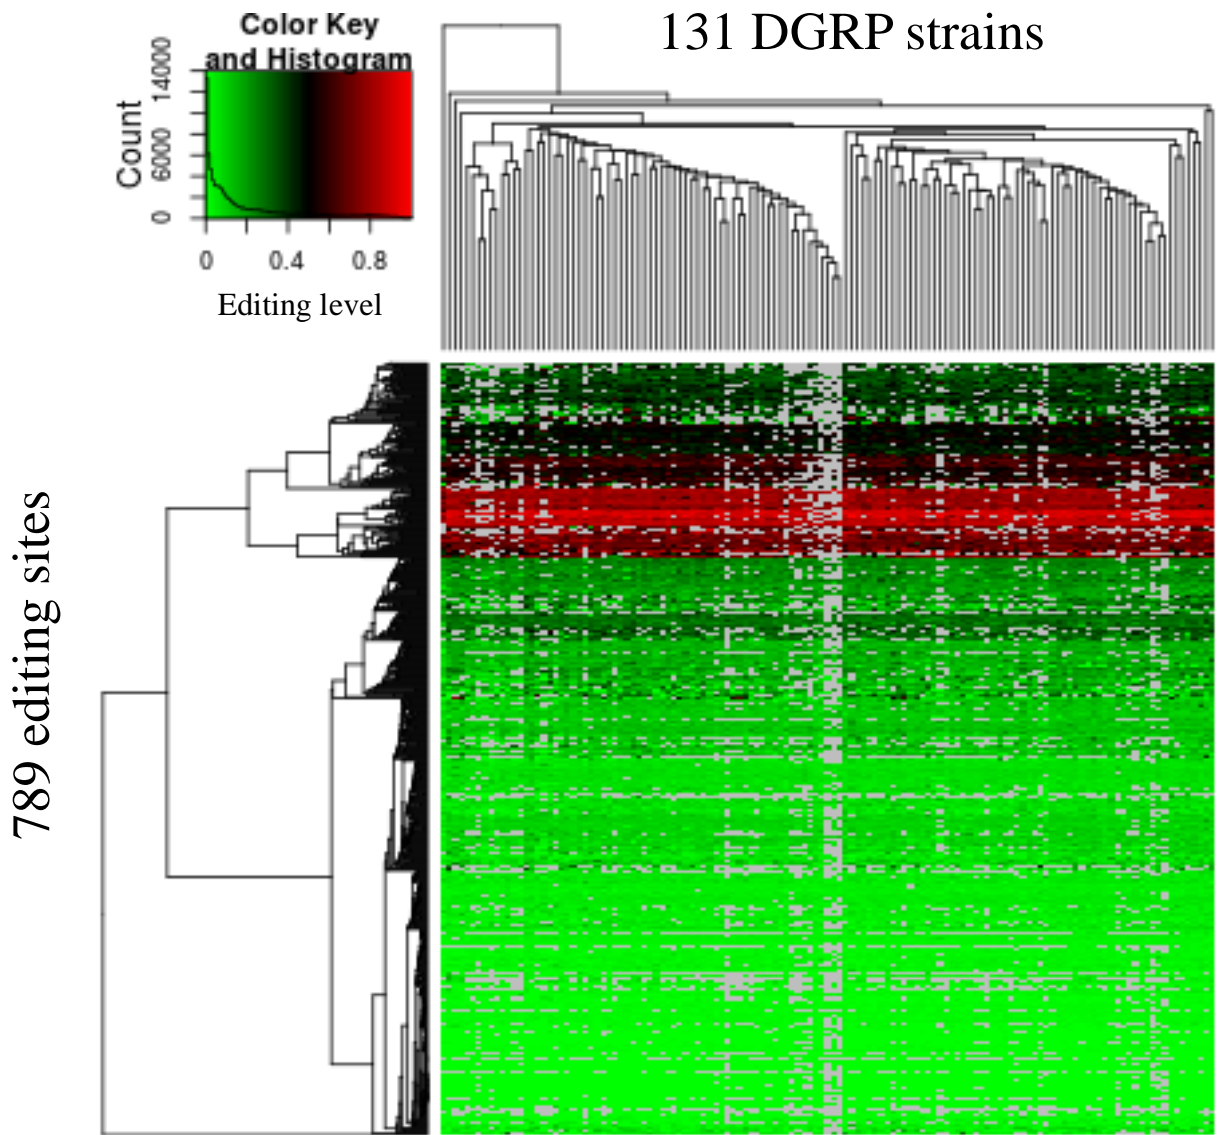

**Supplementary Figure 4 – Quantification of editing levels at 789 sites in 131 DGRP strains.** Heatmap of editing levels at 789 sites in 131 strains measured by mmPCR-seq. Editing sites without measurements are colored in grey.

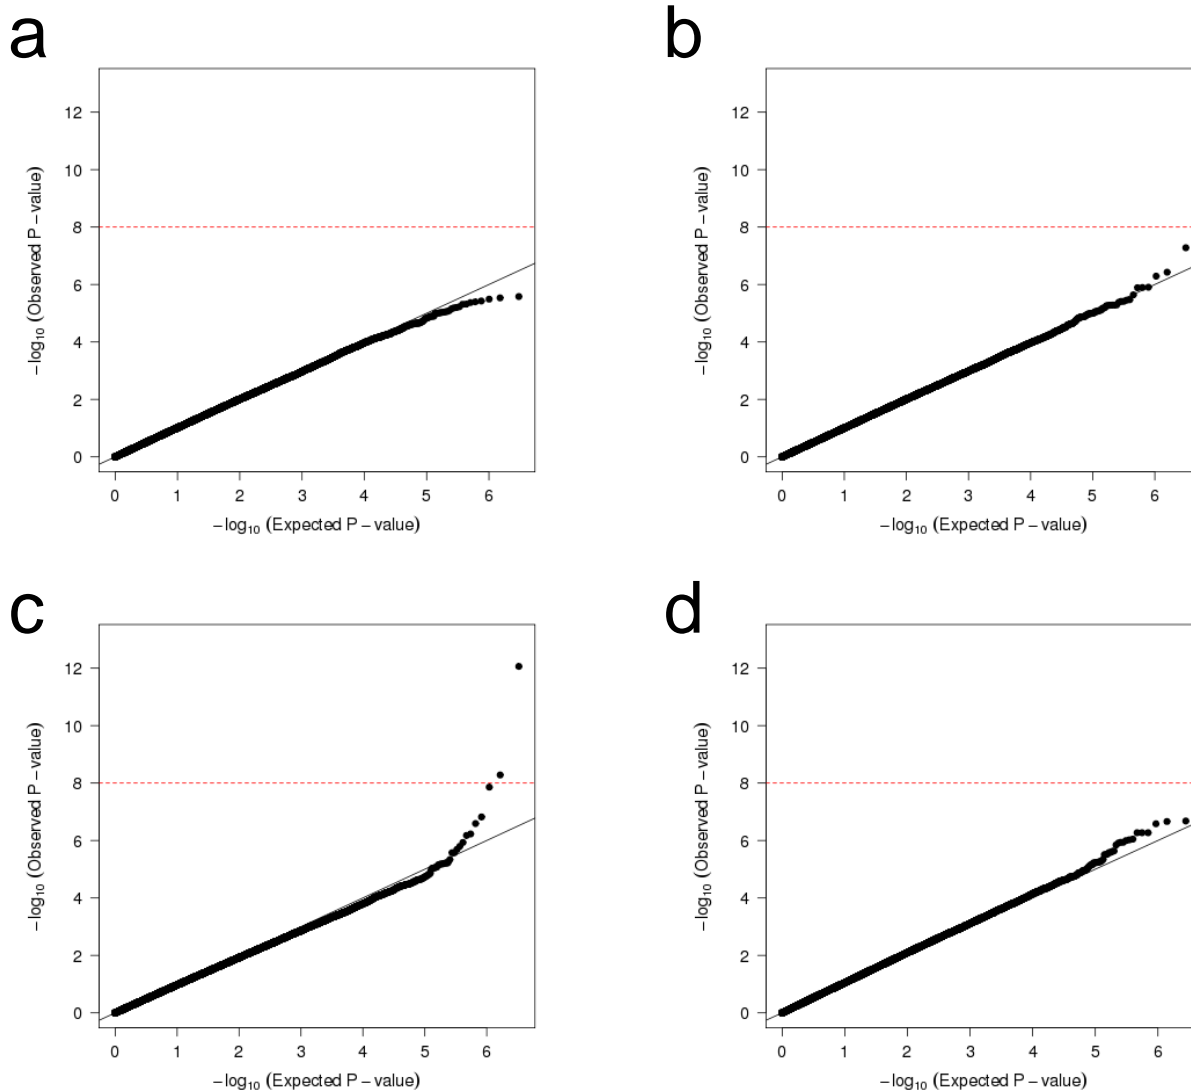

**Supplementary Figure 5 – Genome wide edQTL mapping.** QQ plots showing the distribution of test statistics for associations between editing levels and genotypes for all variants genome-wide for (a) chr2L:12724493 (b) chr2L:4986891 (c) chr2L:3503650 and (d) chr2L:283707. Red dashed lines represent a genome wide significance threshold of  $1e-8$  (Bonferroni correction).

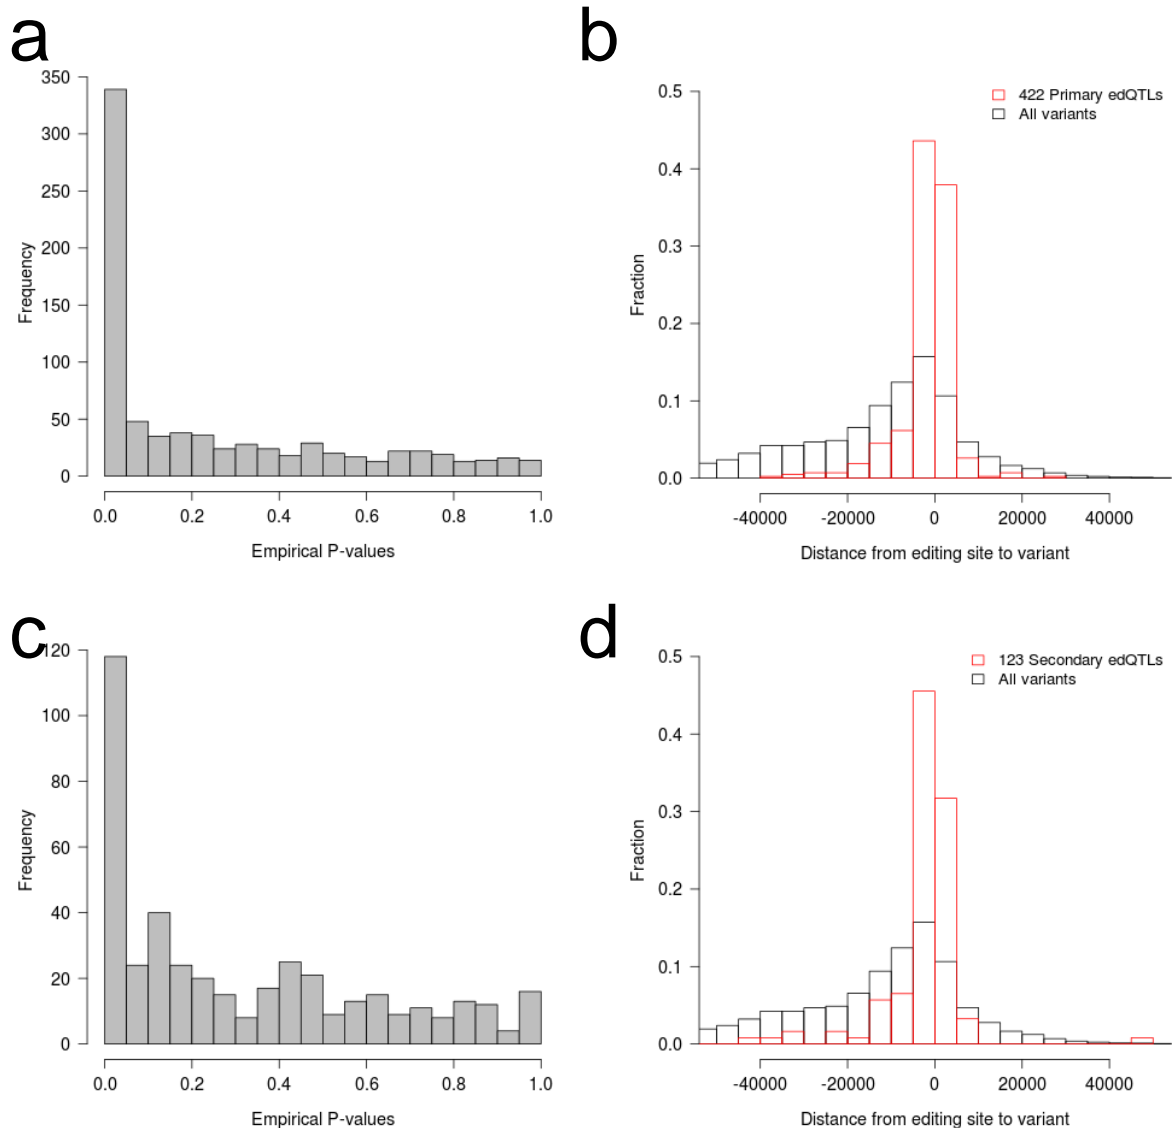

**Supplementary Figure 6 - RNA editing QTL mapping.** (a,c) Empirical P-value distributions for the most strongly associated variant for each RNA editing site based on 10,000 random permutations. (a) Primary edQTL mapping for 789 RNA editing sites and (c) secondary edQTL mapping after regressing out the effect of the primary edQTL for 422 editing sites. (b,d) Distance from the editing site to the edQTL is plotted for (b) primary edQTLs and (d) secondary edQTLs.

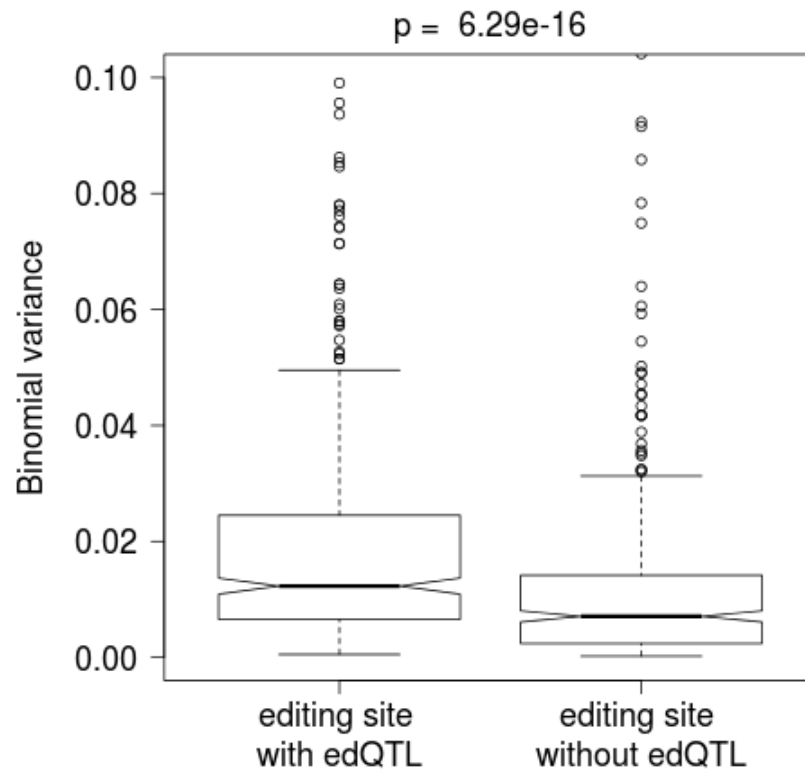

**Supplementary Figure 7 – Variability in editing levels.** Binomial variance values for editing sites with an edQTL vs editing sites without an edQTL (one sided Mann-Whitney U-test).

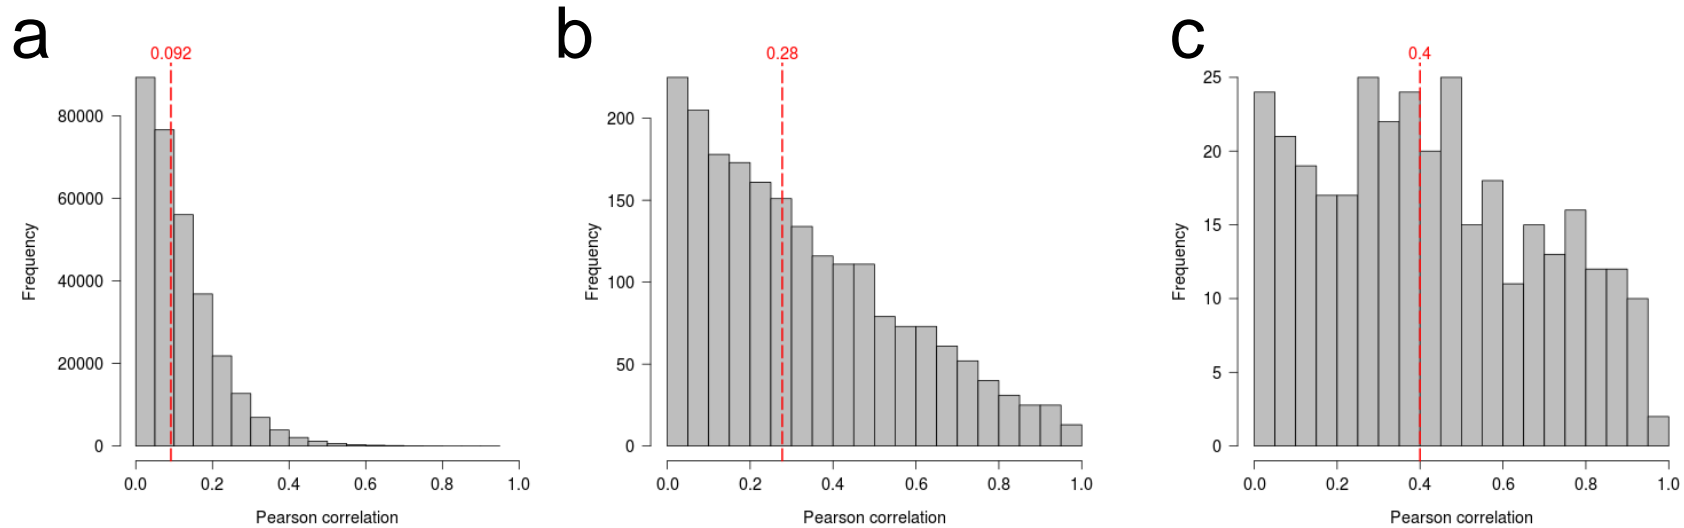

**Supplementary Figure 8 - Pairwise correlations of RNA editing sites.** Pairwise spearman correlations between editing sites in (a) different genes, (b) in the same gene, and (c) in the same dsRNA duplex. Dashed red lines correspond to the median values.



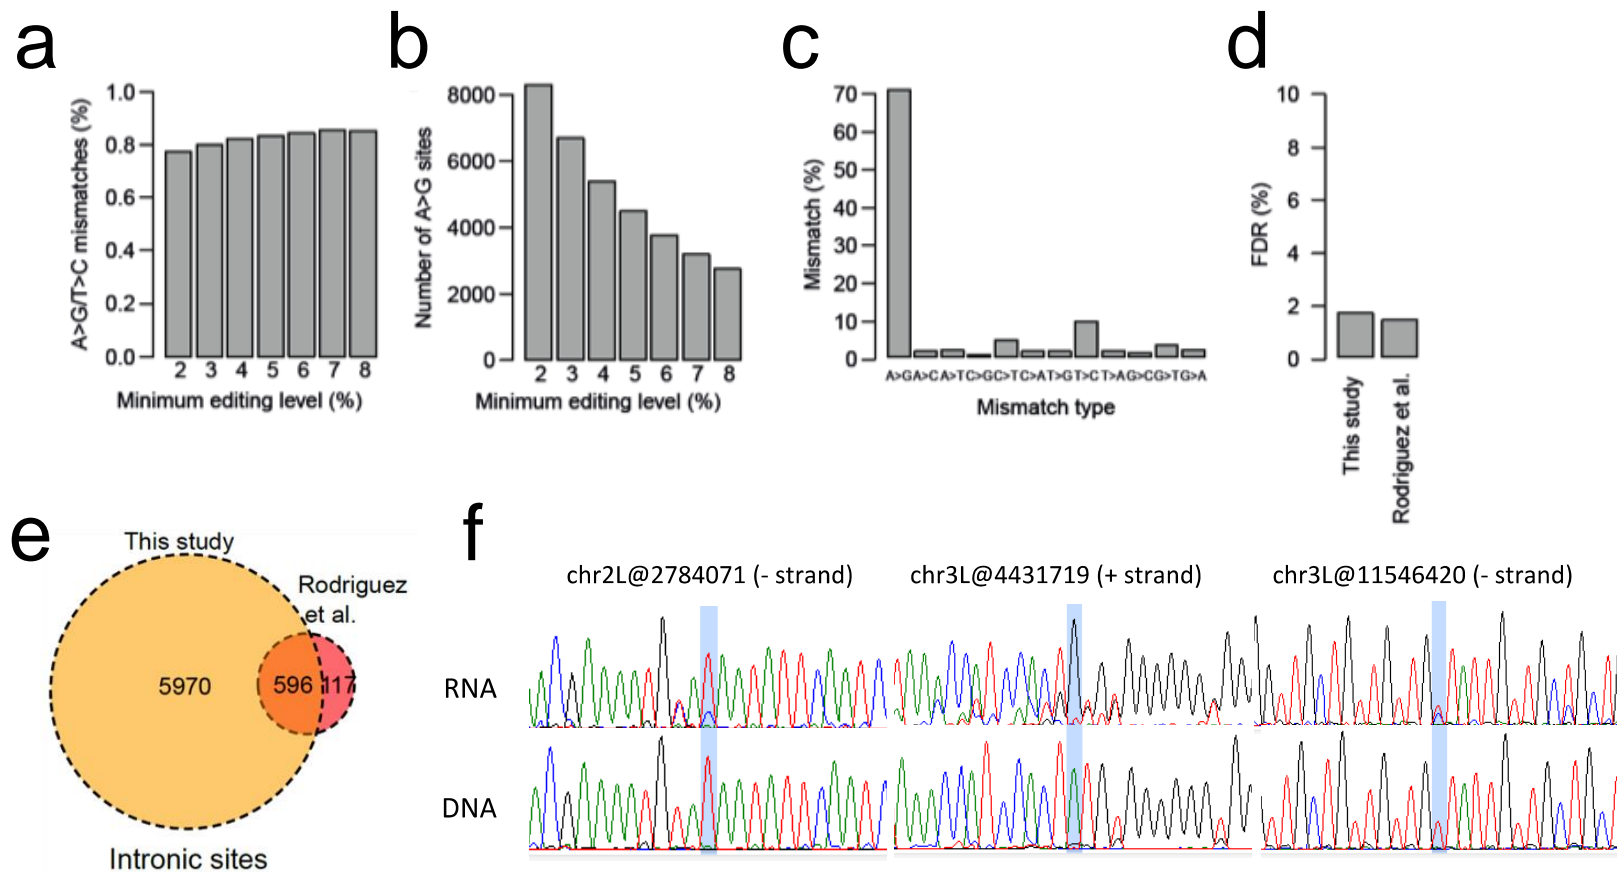

**Supplementary Figure 9 - Accurate identification of intronic RNA editing sites in *D. melanogaster*.** (a) Relationship between the proportion of detected mismatches that are A-to-G/T-to-C and the minimum editing level cutoff (i.e., the percentage of reads with the variant nucleotide). (b) Relationship between the number of A-to-G variants and the minimum editing level cutoff. (c) Percentage of RNA variants of all 12 mismatch types. (d) The FDR of intronic RNA editing site identification for the 2 specified studies. FDR was calculated by identifying A-to-G mismatches present in nascent RNA-seq from ADAR null flies. (e) Overlap between intronic RNA editing sites found in this study and those found previously. (f) Sanger sequencing validation of three randomly chosen novel intronic editing sites (highlighted in blue).

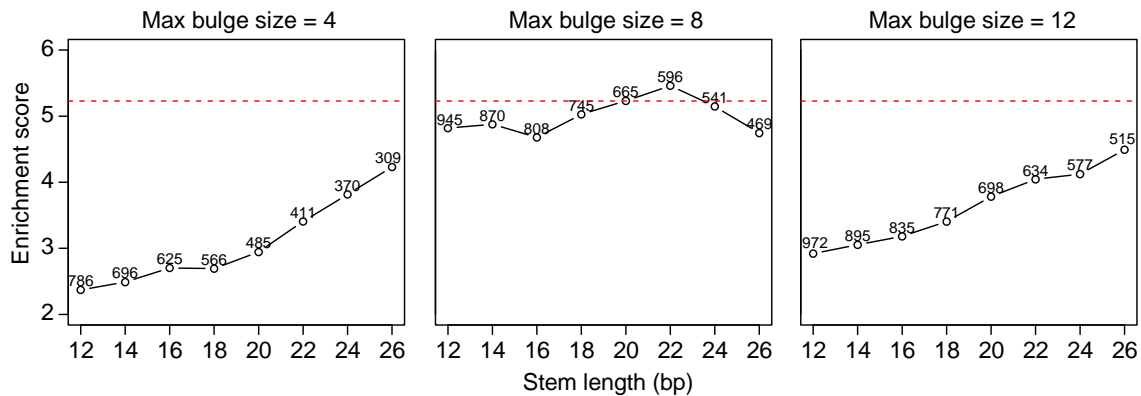

**Supplementary Figure 10 - Selecting cutoffs for editing complementary sequence (ECS) predictions.** The enrichment of editing sites in predicted ECS regions relative to the nearby control regions (**Fig. 3a**), with various min stem length and max bulge size cutoffs. The enrichment score is the number of editing sites in predicted ECSs divided by that in control regions. The number of ECS regions predicted for each cutoff is indicated on the plot. The red dotted line indicates the enrichment score of the cutoff finally selected for use.

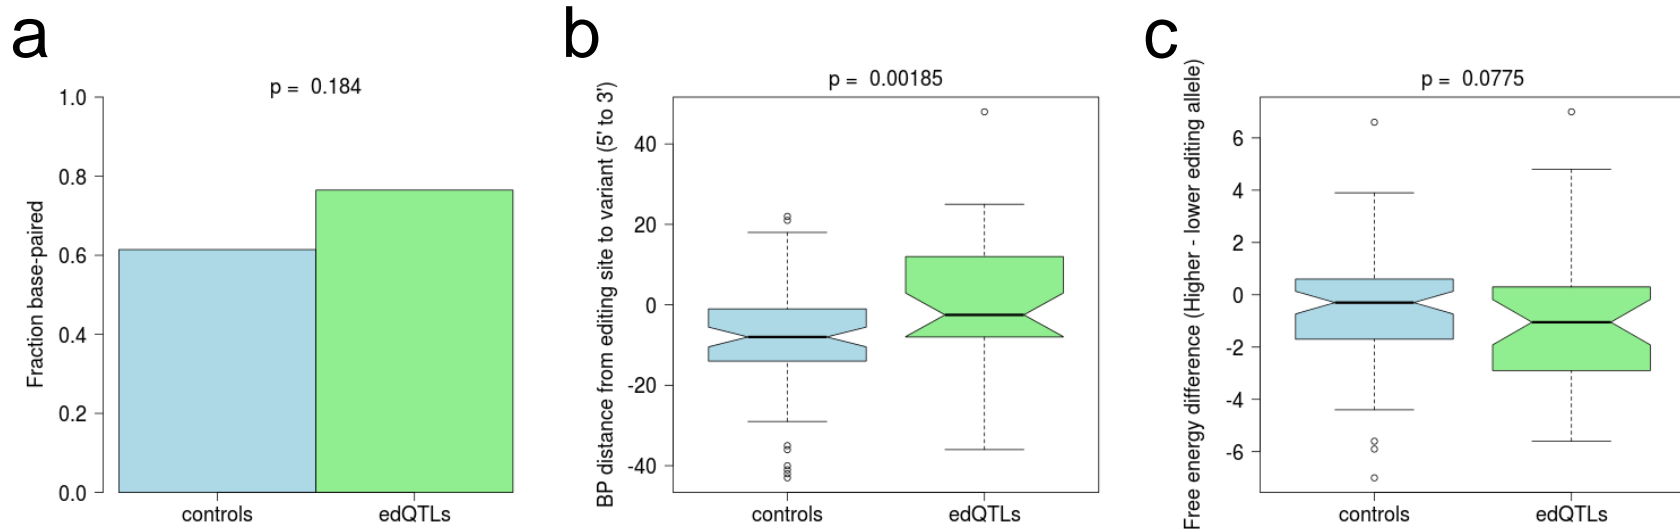

**Supplementary Figure 11 - Effects of edQTLs on edited dsRNA structures.** Same plots as Figure 4b,d,f except using all edQTLs. **(a)** Fraction of edQTLs and control variants positioned at base-paired nucleotides (Fisher's exact test). **(b)** Base-pair distances from edQTLs and control variants to the editing site (one-sided Mann-Whitney U-test). **(c)** Difference in dsRNA free energies between the two alleles for edQTLs and control variants, calculated as the free energy of lower edited allele subtracted from the higher edited allele (one-sided Mann-Whitney U-test).

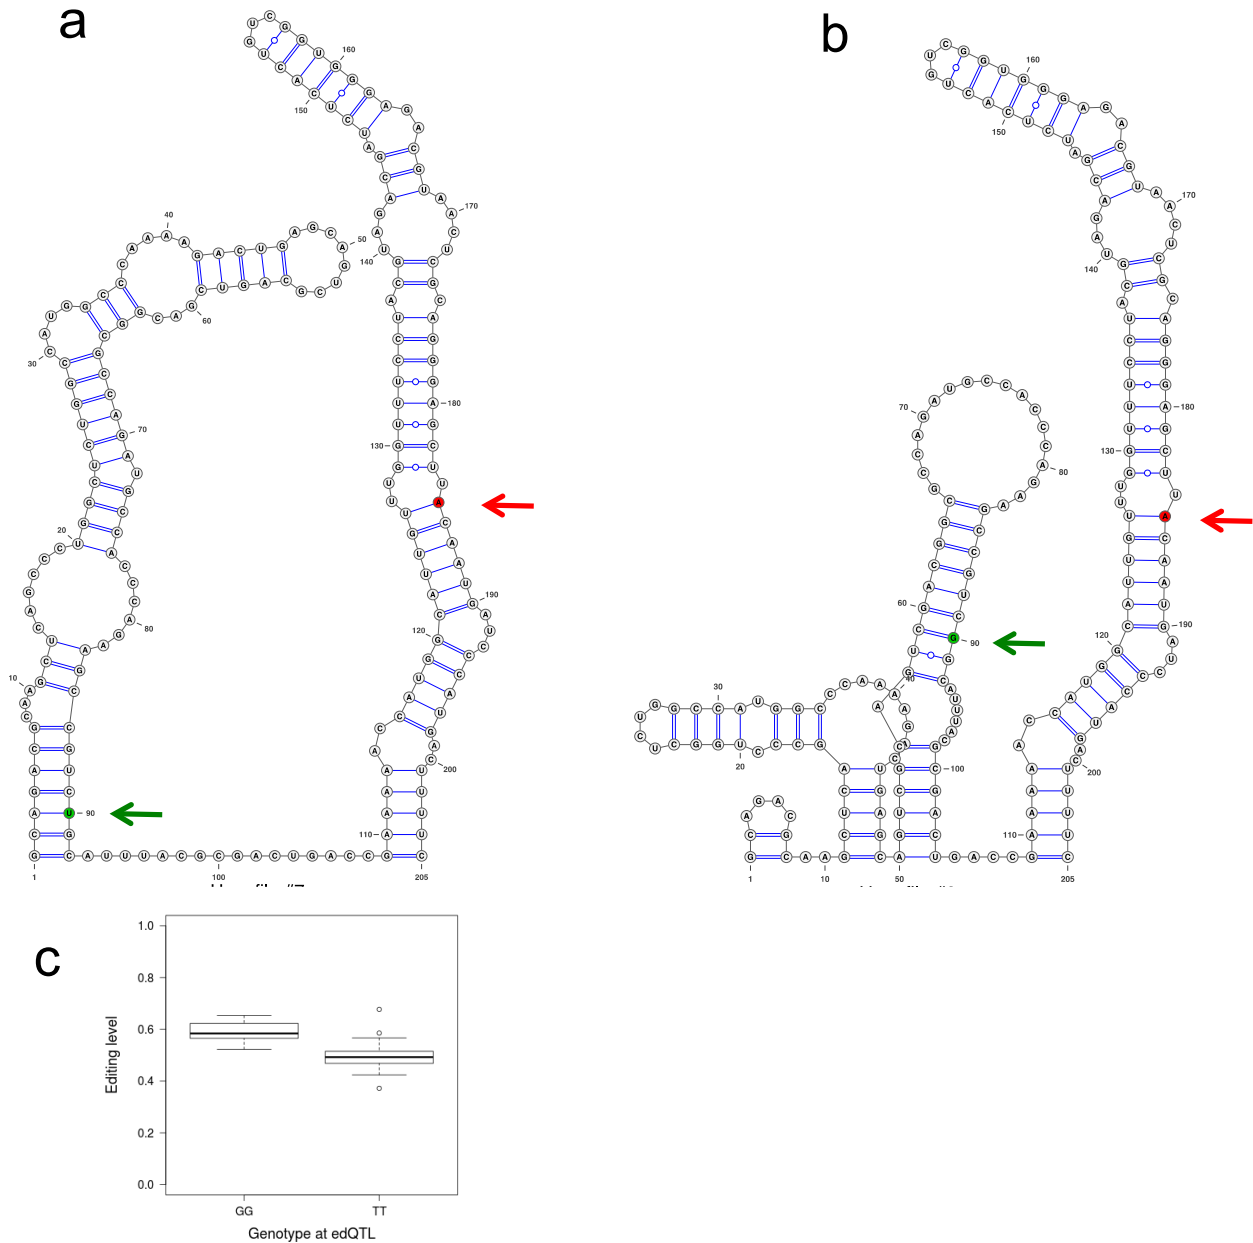

**Supplementary Figure 12 – Distal edQTL in secondary dsRNA stem modulates editing in the NaCP60E gene. (a,b)** RNA secondary structure predictions for the (a) T allele and the (b) G allele. The red arrow points towards the editing site (highlighted in red) and the green arrow points towards the distal edQTL (highlighted in green). (c) Relationship between editing levels and strain genotypes for the edQTL in NaCP60E.

## Supplementary Tables

**Supplementary Table 1 - Summary of previously identified ECSs in *Drosophila melanogaster*.**

| Chrom | Gene    | Gene name       | Exonic edited positions            | Edited stem start | Edited stem end | ECS start | ECS end  | Note                                             | Reference    |
|-------|---------|-----------------|------------------------------------|-------------------|-----------------|-----------|----------|--------------------------------------------------|--------------|
| chr2L | CG3139  | Synaptotagmin 1 | 2785542                            | 2785510           | 2785546         | 2784048   | 2784086  | pseudoknot                                       | <sup>1</sup> |
| chr2L | CG3139  | Synaptotagmin 1 | 2785605, 2785606, 2785610, 2785621 | 2785595           | 2785625         | 2784345   | 2784376  | pseudoknot;<br>part of the<br>above<br>structure | <sup>1</sup> |
| chrX  | CG9907  | Paralytic       | 16367661, 16367670, 16367671       | 16367658          | 16367675        | 16366514  | 16366536 |                                                  | <sup>2</sup> |
| chrX  | CG9907  | Paralytic       | 16376715, 16376716, 16376726       | 16376700          | 16376735        | 16375881  | 16375919 |                                                  | <sup>3</sup> |
| chrX  | CG12348 | Shaker          | 17824684, 17824687, 17824691       | 17824667          | 17824694        | 17826897  | 17826927 |                                                  | <sup>4</sup> |
| chrX  | CG12348 | Shaker          | 17824766                           | 17824757          | 17824785        | 17825734  | 17825760 |                                                  | <sup>4</sup> |
| chrX  | CG12348 | Shaker          | 17844072, 17844090                 | 17844062          | 17844092        | 17842741  | 17842772 |                                                  | <sup>4</sup> |

**Supplementary Table 2 – dsRNA stems identified around distal edQTLs**

| <b>Chrom</b> | <b>Position</b> | <b>Strand</b> | <b>complement_start</b> | <b>complement_end</b> | <b>QTLduplex_start</b> | <b>QTLduplex_end</b> |
|--------------|-----------------|---------------|-------------------------|-----------------------|------------------------|----------------------|
| chr3R        | 23498276        | +             | 23498339                | 23498364              | 23498253               | 23498279             |
| chr3L        | 9826538         | +             | 9826574                 | 9826603               | 9826537                | 9826564              |
| chr3R        | 27668532        | +             | 27668333                | 27668358              | 27668516               | 27668539             |
| chr2R        | 20798251        | +             | 20798162                | 20798207              | 20798216               | 20798253             |
| chr2L        | 8202442         | -             | 8202395                 | 8202428               | 8202438                | 8202469              |
| chr3R        | 23499447        | +             | 23499541                | 23499566              | 23499436               | 23499464             |
| chr3R        | 21792114        | +             | 21792065                | 21792105              | 21792113               | 21792150             |
| chr2L        | 16176451        | +             | 16176473                | 16176496              | 16176441               | 16176465             |
| chr3R        | 20492805        | +             | 20492837                | 20492881              | 20492789               | 20492828             |
| chr3L        | 9826547         | +             | 9826574                 | 9826603               | 9826537                | 9826564              |
| chr2L        | 8202440         | -             | 8202394                 | 8202428               | 8202438                | 8202470              |
| chr2R        | 9698348         | +             | 9698472                 | 9698502               | 9698326                | 9698355              |
| chrX         | 1272323         | +             | 1272500                 | 1272523               | 1272308                | 1272329              |
| chr2R        | 4757819         | +             | 4757844                 | 4757882               | 4757802                | 4757839              |
| chr2R        | 20798580        | +             | 20798387                | 20798411              | 20798571               | 20798602             |
| chrX         | 14723771        | -             | 14723708                | 14723740              | 14723748               | 14723780             |
| chr2R        | 9067191         | -             | 9067029                 | 9067066               | 9067189                | 9067219              |
| chrX         | 19536050        | -             | 19536091                | 19536133              | 19536047               | 19536086             |
| chr3R        | 4666009         | -             | 4665915                 | 4665948               | 4665975                | 4666010              |
| chr3R        | 20533219        | +             | 20533385                | 20533416              | 20533199               | 20533229             |
| chr2R        | 18277541        | +             | 18277469                | 18277515              | 18277528               | 18277575             |
| chr3L        | 21323854        | +             | 21323893                | 21323931              | 21323853               | 21323888             |
| chrX         | 17880884        | -             | 17880767                | 17880820              | 17880858               | 17880913             |
| chr2R        | 20307749        | -             | 20307687                | 20307728              | 20307733               | 20307782             |
| chrX         | 6007239         | -             | 6007115                 | 6007149               | 6007221                | 6007251              |
| chr3R        | 23499562        | +             | 23499436                | 23499464              | 23499541               | 23499566             |
| chr2L        | 6453262         | -             | 6453340                 | 6453419               | 6453262                | 6453334              |
| chr3R        | 19900751        | -             | 19900838                | 19900899              | 19900747               | 19900804             |

## Supplementary References

1. Reenan RA. Molecular determinants and guided evolution of species-specific RNA editing. *Nature* 434, 409-413 (2005).
2. Hanrahan CJ, Palladino MJ, Ganetzky B, Reenan RA. RNA editing of the *Drosophila* para Na(+) channel transcript. Evolutionary conservation and developmental regulation. *Genetics* 155, 1149-1160 (2000).
3. Reenan RA, Hanrahan CJ, Ganetzky B. The mle(napts) RNA helicase mutation in *Drosophila* results in a splicing catastrophe of the para Na<sup>+</sup> channel transcript in a region of RNA editing. *Neuron* 25, 139-149 (2000).
4. Ingleby L, Maloney R, Jepson J, Horn R, Reenan R. Regulated RNA editing and functional epistasis in Shaker potassium channels. *The Journal of general physiology* 133, 17-27 (2009).
